# Supplementary material for: Deep-Water Fish Are Potential Vectors of Ciguatera Poisoning in the Gambier Islands, French Polynesia
Source: MDPI journal article supplement (doi:10.3390/md19110644), 2021-11-17
Supplement: s1 [file s1]

## Supplementary Materials: Deep-Water Fish are Potential Vectors of Ciguatera Poisoning in the Gambier Islands, French Polynesia

Hélène Taiana Darius <sup>1,\*</sup>, Taina Revel <sup>1</sup>, Philippe Cruchet <sup>1</sup>, Jérôme Viallon <sup>1</sup>, Clémence Mahana iti Gatti <sup>1</sup>, Manoëlla Sibat <sup>2</sup>, Philipp Hess <sup>2</sup> and Mireille Chinain <sup>1</sup>

<sup>1</sup> Laboratory of Marine Biotoxins, Institut Louis Malardé (ILM), UMR 241-EIO (IFREMER, ILM, IRD, University of French Polynesia), PO Box 30, 98713 Papeete, Tahiti, French Polynesia; trevel@ilm.pf (T.R.); pcruchet@ilm.pf (P.C.); jviallon@ilm.pf (J.V.); cgatti@ilm.pf (C.M.i.G.); mchinain@ilm.pf (M.C.)

<sup>2</sup> Laboratoire Phycotoxines, DYNECO, Institut Français de Recherche pour l'Exploitation de la MER, F-44000 Nantes, France; manoella.sibat@ifremer.fr (M.S.); philipp.hess@ifremer.fr (P.H.)

\* Correspondence: tdarius@ilm.pf; Tel.: +689-40-416-484

**Table S1.** Ciguatera poisonings caused by the consumption of deep-water fish in French Polynesia from 1999 to 2021.

| Event | Number of patient | Year of event | Location           | Fish name                                                     |
|-------|-------------------|---------------|--------------------|---------------------------------------------------------------|
| #1*   | 1                 | 1999          | Anaa, Tumaotu      | « Paru », Jobfish                                             |
| #2*   | 3                 | 1999          | Unknown            | « Paru », Jobfish                                             |
| #3    | 1                 | 2003          | Mangareva, Gambier | « Uravena », Oilfish ( <i>Ruvettus pretiosus</i> )            |
| #4    | 1                 | 2003          | Mangareva, Gambier | « Paru », Jobfish                                             |
| #5    | 2                 | 2003          | Unknown            | « Paru », Jobfish                                             |
| #6    | 1                 | 2006          | Rangiroa, Tuamotu  | « Paru », Jobfish                                             |
| #7*   | 1                 | 2006          | Raroia, Tuamotu    | « Paru », Jobfish                                             |
| 8*    | 1                 | 2010          | Rurutu, Australes  | « Uravena », Oilfish ( <i>Ruvettus pretiosus</i> )            |
| #9*   | 6                 | 2010          | Tubuai, Australes  | « Uravena », Oilfish ( <i>Ruvettus pretiosus</i> )            |
| #10*  | 2                 | 2011          | Rurutu, Australes  | « Paru », Jobfish                                             |
| #11*  | 1                 | 2011          | Hao, Tuamotu       | « Paru Tahakari », Rusty jobfish ( <i>Aphareus rutilans</i> ) |
| #12*  | 1                 | 2020          | Mangareva, Gambier | « Paru », Jobfish                                             |

\*Clinical information were reported for eight of these events: diarrhea (70%), vomiting (50%) and nausea(20%), among digestive manifestations; severe hypotension (20%) and bradycardia (20%) among cardiovascular manifestations, then cold allodynia(70%), tingling (60%), muscular disorders (70%), arthralgia (60%), itching (50%), dizziness/balance disorder (50%), paresthesia (40%), headache (30%), vision disorders (30%), dysgeusia (20%) and throat and mouth burning sensation (20%) among neurological and general manifestations. According to the patients, symptoms appeared within 12h after the consumption of the fish, 2h for the earliest. Note that both the clinical manifestations and the incubation time are compatible with CP diagnosis.

**Table S2.** List of deep-water fish specimens collected by two local commercial fishermen in 2003 from the Gambier Archipelago (French Polynesia).

| Family     | Species                                                    | Common name                    | Tahitian name    | Diet <sup>a</sup>                                                 | Site                 | Date     | Sample # | Depth (m) | Weight (g)        | Length (cm)     |
|------------|------------------------------------------------------------|--------------------------------|------------------|-------------------------------------------------------------------|----------------------|----------|----------|-----------|-------------------|-----------------|
| Serranidae | <i>Saloptia powelli</i><br>(Smith, 1964)                   | Golden grouper                 | Paru hoa         | Finfishes, Crustaceans                                            | Unknown <sup>b</sup> | 23/10/03 | 1        | NI        | NI                | NI              |
|            |                                                            |                                |                  |                                                                   |                      |          | 2        | NI        | NI                | NI              |
|            |                                                            |                                |                  |                                                                   |                      |          | 3        | NI        | NI                | NI              |
|            |                                                            |                                |                  |                                                                   | Tauna                | 17/12/03 | 4        | 300       | 698               | 38              |
|            |                                                            |                                |                  |                                                                   |                      |          | 5        | 300       | 452               | 34              |
|            |                                                            |                                |                  |                                                                   | East Tepapuri        | 18/12/03 | 6        | 350       | 707               | 38.5            |
|            |                                                            |                                |                  |                                                                   | North Tepapuri       | 19/12/03 | 7        | 300       | 967               | 42.5            |
|            |                                                            |                                |                  |                                                                   | Gaioio               | 20/12/03 | 8        | 300       | 729               | 38.5            |
|            |                                                            |                                |                  |                                                                   | Tenoko               | 21/12/03 | 9        | 250-300   | 927               | 42              |
|            |                                                            |                                |                  |                                                                   |                      | 22/12/03 | 10       | 300       | 963               | 42              |
|            |                                                            |                                |                  |                                                                   | Tekava               | 23/12/03 | 11       | 280-350   | 789               | 39              |
|            |                                                            |                                |                  |                                                                   |                      | 25/12/03 | 12       | 250       | 941               | 42              |
|            |                                                            |                                |                  |                                                                   | Totegegégie          | 26/12/03 | 13       | 250       | 722               | 37              |
|            |                                                            |                                |                  |                                                                   |                      | 27/12/03 | 14       | 250       | 928               | 39              |
|            |                                                            |                                |                  |                                                                   | Gaioio               | 28/12/03 | 15       | 250       | 740               | 38              |
| Lutjanidae | <i>Epinephelus tuamotuensis</i><br>(Fourmanoir, 1971)      | Reticulate grouper             | Hapu'u hei       | Finfishes, crustaceans, small « eels »                            | Gaioio               | 28/11/03 | 16       | 250-300   | 2426              | NI              |
|            |                                                            |                                |                  |                                                                   | Tokorua              | 11/12/03 | 17       | 300       | 5000              | 68              |
|            | <i>Etelis coruscans</i><br>(Valenciennes, 1862)            | Deepwater longtail red snapper | Paru i'ihī Onaga | Cephalopods, finfishes, benthic crustaceans                       | Unknown              | 23/10/03 | 18       | NI        | 2100              | NI              |
|            |                                                            |                                |                  |                                                                   | Tokorua              | 11/12/03 | 19       | 300       | 2340              | 58              |
| Lutjanidae | <i>Pristipomoides filamentosus</i><br>(Valenciennes, 1830) | Crimson jobfish                | Paru utu         | Cephalopods, finfishes, benthic crustaceans, echinoderms, sponges | Unknown              | 24/11/03 | 20       | 350       | 3549              | NI              |
|            |                                                            |                                |                  |                                                                   | Tokorua              | 11/12/03 | 21       | 300       | 2940              | 58              |
| Bramidae   | <i>Eumegistus illustris</i><br>(Jordan & Jordan, 1922)     | Brilliant pomfret              | Paru papio       | Cephalopods, finfishes, micronekton, crustaceans                  | Tokorua              | 11/12/03 | 22       | 300       | 5000 <sup>c</sup> | 45 <sup>c</sup> |

<sup>a</sup>Diet information collected from [Bonsonnet \(2002\)](#), [Gray \(2016\)](#), and [www.fishbase.org](http://www.fishbase.org) (2021). <sup>b</sup>Unknown = no information about fishing site, depth, weight, or size data for these fish samples.

<sup>c</sup>Weight and size were indicated for a portion of the fish, the whole fish was not provided.

**Table S3.** Selected  $m/z$  transitions and liquid chromatography tandem mass spectrometry (LC-MS/MS) instrument parameters used for the scheduled MRM method on C18 Zorbax Eclipse plus column (50\*2.1 mm, Agilent technologies) with a linear gradient of Eluent A (water) and eluent B (methanol), both eluents containing 2 mM ammonium formate and 50 mM formic acid.

| Compound                                                  | Detection window (min) | Precursor ion (Q1) $m/z$                 | Product ion (Q3) $m/z$    | DP (eV) | CE (eV) | CXP (eV) |
|-----------------------------------------------------------|------------------------|------------------------------------------|---------------------------|---------|---------|----------|
| CTX1B, CTX1A                                              | 3.1 ± 1                | 1128.6 [M+NH <sub>4</sub> ] <sup>+</sup> | 1093.6                    | 105     | 20      | 12       |
|                                                           |                        |                                          | 1075.6                    | 105     | 30      | 12       |
|                                                           |                        |                                          | 95.1                      | 105     | 90      | 20       |
| M-seco-CTX3C                                              | 4.7 ± 1                | 1041.6 [M+H] <sup>+</sup>                | 1023.6                    | 105     | 30      | 12       |
|                                                           |                        |                                          | 1005.6                    | 105     | 20      | 12       |
|                                                           |                        |                                          | 125.1                     | 105     | 50      | 18       |
| 2,3-dihydro-2-hydroxyCTX3C and 2,3-dihydro-3-hydroxyCTX3C | 5.4 ± 1                | 1058.6 [M+NH <sub>4</sub> ] <sup>+</sup> | 1023.6                    | 105     | 30      | 12       |
|                                                           |                        |                                          | 1005.6                    | 105     | 20      | 12       |
|                                                           |                        |                                          | 125.1                     | 105     | 50      | 18       |
| 2,3-dihydro-2,3-dihydroxyCTX3C                            | 6.0 ± 1                | 1074.6 [M+NH <sub>4</sub> ] <sup>+</sup> | 1039.6                    | 105     | 30      | 12       |
|                                                           |                        |                                          | 1057.6 [M+H] <sup>+</sup> | 1039.6  | 105     | 20       |
|                                                           |                        |                                          | 125.1                     | 105     | 50      | 18       |
| 51-hydroxyCTX3C                                           | 6.3 ± 1                | 1056.6 [M+NH <sub>4</sub> ] <sup>+</sup> | 1021.6                    | 105     | 30      | 12       |
|                                                           |                        |                                          | 1039.6 [M+H] <sup>+</sup> | 1021.6  | 105     | 20       |
|                                                           |                        |                                          | 1003.6                    | 105     | 20      | 12       |
| M-seco-CTX4A/4B                                           | 6.5 ± 1                | 1096.6 [M+NH <sub>4</sub> ] <sup>+</sup> | 1043.7                    | 105     | 30      | 12       |
|                                                           |                        |                                          | 1079.6 [M+H] <sup>+</sup> | 1043.7  | 105     | 20       |
|                                                           |                        |                                          | 125.1                     | 105     | 50      | 18       |
| 52- <i>epi</i> -54-deoxyCTX1B and 54-deoxyCTX1B           | 6.8 ± 1                | 1112.6 [M+NH <sub>4</sub> ] <sup>+</sup> | 1077.6                    | 105     | 20      | 12       |
|                                                           |                        |                                          | 1059.6                    | 105     | 30      | 12       |
|                                                           |                        |                                          | 95.1                      | 105     | 90      | 20       |
| CTX3C isomers (1), (2) and (3)                            | 7.6 ± 1                | 1040.6 [M+NH <sub>4</sub> ] <sup>+</sup> | 1005.6                    | 105     | 30      | 12       |
|                                                           |                        |                                          | 1023.6 [M+H] <sup>+</sup> | 1005.6  | 105     | 20       |
|                                                           |                        |                                          | 125.1                     | 105     | 20      | 12       |
| CTX3C, 49- <i>epi</i> CTX3C (CTX3B) and isomer (4)        | 10.5 ± 1               | 1040.6 [M+NH <sub>4</sub> ] <sup>+</sup> | 1005.6                    | 105     | 30      | 12       |
|                                                           |                        |                                          | 1023.6 [M+H] <sup>+</sup> | 1005.6  | 105     | 20       |
|                                                           |                        |                                          | 125.1                     | 105     | 50      | 18       |
| CTX4A and CTX4B                                           | 12.2 ± 1               | 1078.6 [M+NH <sub>4</sub> ] <sup>+</sup> | 1043.6                    | 105     | 30      | 12       |
|                                                           |                        |                                          | 1061.6 [M+H] <sup>+</sup> | 1043.6  | 105     | 20       |
|                                                           |                        |                                          | 125.1                     | 105     | 50      | 18       |

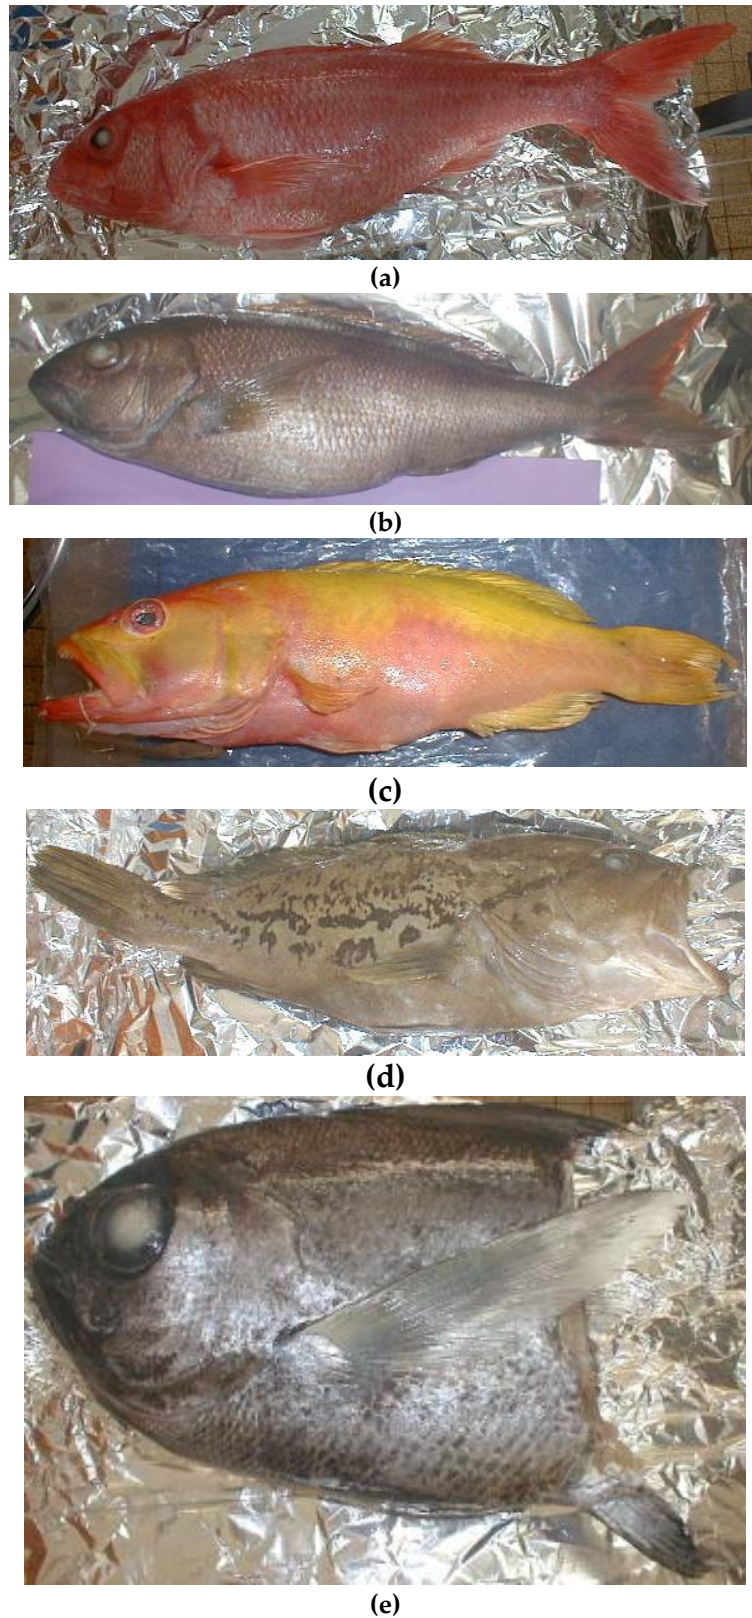

**Figure S1.** Pictures of deep-water fish species collected and send by two local commercial fishermen from the Gambier Archipelago in 2003 analyzed in the present study: (a) *Etelis coruscans*, (b) *Pristipomoides filamentosus*, (c) *Saloptia powelli*, (d) *Epinephelus tuamotuensis*, and (e) *Eumegistus illustris*.
